# Supplementary material for: Common ancestry of heterodimerizing TALE homeobox transcription factors across Metazoa and Archaeplastida
Source: PubMed Central journal article supplement (PMC6219170; doi:10.1186/s12915-018-0605-5), 2018-11-05
Supplement: 12915_2018_605_MOESM4_ESM.pdf [file 12915_2018_605_MOESM4_ESM.pdf]

## Additional file 4 for Joo et al.

Article title: Evolution of heterodimerizing TALE homeobox transcription factors as a developmental mechanism for the haploid-to-diploid transition.

Authors: Sunjoo Joo, Ming Hsiu Wang, Gary Lui, Jenny Lee, Andrew Barnas, Eunsoo Kim, Sebastian Sudek, Alexandra Z. Worden, and Jae-Hyeok Lee.

## Supplemental Data S1-S2

### Data S1. HMM-motif search result

Query: KNA\_JW2 [M=31]

Scores for complete sequences (score includes all domains):

| --- full sequence --- |       |      | --- best 1 domain --- |       |      | -#dom- |   |                         |
|-----------------------|-------|------|-----------------------|-------|------|--------|---|-------------------------|
| E-value               | score | bias | E-value               | score | bias | exp    | N | Sequence                |
| 2.1e-12               | 41.2  | 0.0  | 8.6e-12               | 39.4  | 0.0  | 2.1    | 1 | RCC809_56605_KNOX       |
| 2.3e-12               | 41.2  | 0.2  | 1.1e-11               | 39.0  | 0.0  | 2.3    | 1 | Ostlu_5313_KNOX         |
| 3.5e-12               | 40.6  | 0.5  | 2.6e-11               | 37.9  | 0.1  | 2.5    | 2 | Ostta_04g04290_KNOX     |
| 2.7e-10               | 34.7  | 1.3  | 5.5e-10               | 33.7  | 0.0  | 2.2    | 1 | Picsa_04387_KNOX        |
| 8.3e-10               | 33.1  | 0.8  | 2e-09                 | 31.9  | 0.0  | 2.1    | 1 | Aceac_AAD51632_KNOX1    |
| 8.7e-10               | 33.1  | 1.1  | 2.9e-09               | 31.4  | 0.2  | 2.4    | 1 | AT1G62360_STM           |
| 1.8e-09               | 32.1  | 1.1  | 5.4e-09               | 30.6  | 0.1  | 2.5    | 1 | RCC299_62285_KNOX       |
| 1.9e-09               | 32.0  | 0.2  | 7.3e-09               | 30.2  | 0.0  | 2.1    | 1 | AT4G08150_BP            |
| 2.8e-09               | 31.5  | 0.0  | 5.3e-08               | 27.5  | 0.0  | 2.9    | 2 | Pp3c21_10320_MKN5       |
| 6.1e-09               | 30.4  | 0.0  | 2.3e-08               | 28.6  | 0.0  | 2.0    | 1 | Pp3c18_18720_MKN2       |
| 1.3e-08               | 29.4  | 0.0  | 3.9e-08               | 27.9  | 0.0  | 1.8    | 1 | Pp3c6_1550_MKN6v2       |
| 1.5e-08               | 29.2  | 0.3  | 6e-08                 | 27.3  | 0.3  | 2.1    | 1 | CCMP1545_69285_KNOX     |
| 1.5e-08               | 29.2  | 0.0  | 4.6e-08               | 27.7  | 0.0  | 1.9    | 1 | Pp3c5_26440_MKN1        |
| 1.9e-08               | 28.9  | 0.3  | 8.3e-08               | 26.9  | 0.3  | 2.2    | 1 | Cre08.g375400_KNOX/GSM1 |
| 2.1e-08               | 28.8  | 0.8  | 9.1e-08               | 26.7  | 0.0  | 2.4    | 2 | AT5G25220_KNAT3         |
| 2.3e-08               | 28.6  | 0.5  | 1.7e-07               | 25.9  | 0.0  | 2.7    | 1 | Cymte_Sc9672_1_KNOX     |
| 1.2e-07               | 26.4  | 0.2  | 6.6e-07               | 24.1  | 0.1  | 2.3    | 1 | Cz15g18055v2_KNOX       |
| 3e-07                 | 25.1  | 0.9  | 8.7e-05               | 17.4  | 0.0  | 3.8    | 3 | Klefl00118_0070_KNOX2   |
| 5e-07                 | 24.5  | 0.0  | 1.8e-06               | 22.7  | 0.0  | 2.0    | 1 | Cymte_Sc2807_10_KNOX    |
| 1.6e-06               | 22.9  | 0.0  | 5e-06                 | 21.3  | 0.0  | 1.9    | 1 | CCMP726_01361191_KNOX   |
| 2.6e-06               | 22.2  | 0.1  | 1.3e-05               | 20.0  | 0.1  | 2.3    | 1 | Klefl00113_0180_KNOX1   |
| 4e-06                 | 21.6  | 0.0  | 1.7e-05               | 19.6  | 0.0  | 2.0    | 1 | Cyagl_026930_TALE       |
| 4.7e-06               | 21.4  | 0.0  | 1.2e-05               | 20.1  | 0.0  | 1.7    | 1 | CCMP720_03114_KNOX      |
| 8.6e-06               | 20.6  | 0.0  | 2.9e-05               | 18.9  | 0.0  | 2.0    | 1 | Bathy08g03820_KNOX      |
| 1e-05                 | 20.3  | 0.1  | 0.00014               | 16.8  | 0.0  | 2.5    | 2 | Dunsa_0012s00032v2_KNOX |
| 1.7e-05               | 19.6  | 2.0  | 1.9e-05               | 19.5  | 0.1  | 2.1    | 1 | Pycno_01672_KNOX        |
| 3.1e-05               | 18.8  | 0.0  | 8.9e-05               | 17.4  | 0.0  | 1.8    | 1 | CCMP720_035111_KNOX     |
| 4.5e-05               | 18.3  | 0.2  | 0.00014               | 16.8  | 0.2  | 1.9    | 1 | Gonpe_2g991_KNOX        |
| 0.00024               | 16.1  | 0.8  | 0.0014                | 13.7  | 0.0  | 2.8    | 1 | Cyapa_21179.70_KNOX     |
| 0.00047               | 15.1  | 0.0  | 0.0015                | 13.6  | 0.0  | 2.0    | 1 | Klefl00157_0150_TALE2   |
| 0.0019                | 13.2  | 0.0  | 0.0059                | 11.7  | 0.0  | 1.9    | 1 | CCMP726_01351541_KNOX   |
| 0.0019                | 13.2  | 0.0  | 0.0059                | 11.7  | 0.0  | 1.9    | 1 | CCMP726_01357749_KNOX   |

Query: KNB\_JW2 [M=22]

Scores for complete sequences (score includes all domains):

| --- full sequence ---           |       |      | --- best 1 domain --- |       |      | -#dom- |   |                        |
|---------------------------------|-------|------|-----------------------|-------|------|--------|---|------------------------|
| E-value                         | score | bias | E-value               | score | bias | exp    | N | Sequence               |
| 3.1e-08                         | 27.5  | 0.9  | 3.9e-07               | 24.2  | 0.2  | 3.2    | 2 | Aceac_AAD51632_KNOX1   |
| 2.5e-07                         | 24.8  | 0.7  | 2.1e-06               | 22.0  | 0.4  | 2.7    | 1 | AT4G08150_BP           |
| 4.2e-07                         | 24.1  | 0.6  | 2e-06                 | 22.1  | 0.2  | 2.4    | 1 | AT1G62360_STM          |
| 8.1e-07                         | 23.3  | 0.2  | 3.4e-06               | 21.4  | 0.2  | 2.2    | 1 | Pp3c5_26440_MKN1       |
| 2.1e-06                         | 22.0  | 0.2  | 1.1e-05               | 19.8  | 0.1  | 2.3    | 1 | CCMP726_01361191_KNOX  |
| 1.3e-05                         | 19.6  | 3.4  | 2e-05                 | 19.1  | 0.2  | 3.0    | 2 | Ostlu_5313_KNOX        |
| 2.3e-05                         | 18.8  | 0.0  | 0.00012               | 16.7  | 0.0  | 2.2    | 1 | CCMP720_029342_KNOX    |
| 2.6e-05                         | 18.7  | 0.0  | 0.00024               | 15.8  | 0.0  | 2.6    | 2 | Pp3c18_18720_MKN2      |
| 3.5e-05                         | 18.3  | 0.2  | 0.00015               | 16.4  | 0.2  | 2.1    | 1 | Ostta_04g04290_KNOX    |
| 8.6e-05                         | 17.1  | 0.2  | 0.00044               | 15.0  | 0.2  | 2.3    | 1 | AT5G25220_KNAT3        |
| 9.2e-05                         | 17.0  | 0.5  | 0.00043               | 15.0  | 0.5  | 2.3    | 1 | Cz15g18055v2_KNOX      |
| 0.0001                          | 16.9  | 0.1  | 0.0012                | 13.6  | 0.0  | 2.7    | 2 | Picsa_0325_TALE-R1     |
| 0.00024                         | 15.8  | 0.3  | 0.0014                | 13.4  | 0.2  | 2.5    | 1 | RCC809_56605_KNOX      |
| 0.00027                         | 15.6  | 2.6  | 0.00042               | 15.0  | 0.2  | 2.6    | 2 | Galsu_EME30635_TALE    |
| 0.00035                         | 15.3  | 0.0  | 0.0014                | 13.4  | 0.0  | 2.2    | 1 | Pp3c6_1550_MKN6v2      |
| 0.00038                         | 15.2  | 0.0  | 0.0014                | 13.5  | 0.0  | 2.0    | 1 | Cyapa_21179.70_KNOX    |
| 0.0004                          | 15.1  | 0.2  | 0.01                  | 10.8  | 0.0  | 3.0    | 2 | Porpu_2271.2_TALE      |
| 0.00043                         | 15.0  | 0.1  | 0.0014                | 13.4  | 0.1  | 2.0    | 1 | Pp3c21_10320_MKN5      |
| 0.00046                         | 14.9  | 0.1  | 0.0027                | 12.6  | 0.1  | 2.3    | 1 | Pp3c19_5620V_MKN4      |
| 0.00046                         | 14.9  | 0.8  | 0.0026                | 12.6  | 0.1  | 2.8    | 1 | RCC299_62285_KNOX      |
| 0.00084                         | 14.1  | 0.0  | 0.0047                | 11.9  | 0.0  | 2.4    | 1 | Bathy08g03820_KNOX     |
| 0.00086                         | 14.1  | 0.6  | 0.0044                | 11.9  | 0.0  | 2.5    | 1 | Klefl00118_0070_KNOX2  |
| 0.0014                          | 13.5  | 0.1  | 0.0087                | 11.1  | 0.1  | 2.5    | 1 | CCMP726_01351541_KNOX  |
| 0.0014                          | 13.4  | 1.9  | 0.0035                | 12.3  | 0.2  | 2.5    | 1 | Porum_0247s0008_RKNOX1 |
| 0.0014                          | 13.4  | 0.5  | 0.023                 | 9.8   | 0.1  | 2.9    | 2 | Picsa_04387_KNOX       |
| 0.0014                          | 13.4  | 0.1  | 0.0086                | 11.1  | 0.1  | 2.5    | 1 | CCMP726_01357749_KNOX  |
| 0.0015                          | 13.4  | 2.2  | 0.0044                | 11.9  | 0.2  | 2.7    | 2 | Pyrye_g7505_TALE       |
| 0.0017                          | 13.2  | 0.1  | 0.011                 | 10.7  | 0.1  | 2.4    | 1 | CCMP1545_69285_KNOX    |
| ----- inclusion threshold ----- |       |      |                       |       |      |        |   |                        |
| 0.021                           | 9.9   | 3.5  | 0.016                 | 10.2  | 0.1  | 2.7    | 1 | Gonpe_2g991_KNOX       |

Query: PBC\_JW [M=67]

Scores for complete sequences (score includes all domains):

| --- full sequence --- |       |      | --- best 1 domain --- |       |      | -#dom- |   |                       |
|-----------------------|-------|------|-----------------------|-------|------|--------|---|-----------------------|
| E-value               | score | bias | E-value               | score | bias | exp    | N | Sequence              |
| 2.7e-24               | 79.4  | 0.3  | 5.6e-24               | 78.4  | 0.3  | 1.6    | 1 | Cyame_CMR176C_TALE    |
| 1.2e-19               | 64.5  | 0.4  | 3.3e-18               | 60.0  | 0.3  | 2.3    | 2 | Galsu_EME32651v2_TALE |
| 1.9e-17               | 57.5  | 0.3  | 4.8e-17               | 56.2  | 0.3  | 1.7    | 1 | Chocr_41034_TALE      |
| 3e-17                 | 56.9  | 1.0  | 6e-17                 | 55.9  | 1.0  | 1.5    | 1 | Picsa_04995_TALE-R2   |
| 3.4e-17               | 56.7  | 1.7  | 7.9e-17               | 55.5  | 1.7  | 1.6    | 1 | Porpu_4416.19_TALE    |
| 4.2e-17               | 56.4  | 1.1  | 6.6e-17               | 55.8  | 1.1  | 1.3    | 1 | Glowi_03052_TALE      |
| 5.6e-17               | 56.0  | 0.8  | 5.6e-17               | 56.0  | 0.8  | 1.8    | 2 | HsPBX1                |
| 6.2e-17               | 55.9  | 4.8  | 6.2e-17               | 55.9  | 4.8  | 1.8    | 1 | Porpu_3495.4_TALE     |
| 9e-17                 | 55.3  | 3.6  | 1.8e-16               | 54.4  | 3.6  | 1.5    | 1 | Porpu_2282.2_TALE     |
| 1.1e-16               | 55.1  | 6.8  | 2.2e-16               | 54.1  | 6.8  | 1.5    | 1 | Cyapa_20927.63_PBC1   |
| 2.6e-16               | 53.8  | 2.6  | 5.4e-16               | 52.9  | 2.6  | 1.6    | 1 | Porpu_3495.3_TALE     |

|         |      |     |         |      |     |     |   |                       |
|---------|------|-----|---------|------|-----|-----|---|-----------------------|
| 7.4e-16 | 52.4 | 0.7 | 1.5e-15 | 51.4 | 0.7 | 1.5 | 1 | Porpu_677.2_TALE?     |
| 5e-15   | 49.7 | 0.4 | 5e-15   | 49.7 | 0.4 | 1.9 | 2 | Accas_4342337_PBX     |
| 7.7e-15 | 49.2 | 0.6 | 4.4e-14 | 46.7 | 1.1 | 2.1 | 2 | Porpu_2095.1_TALE?    |
| 1.1e-14 | 48.6 | 1.0 | 2.6e-14 | 47.5 | 1.0 | 1.6 | 1 | Caltu_18607_PBX       |
| 1.3e-14 | 48.4 | 1.0 | 3.5e-14 | 47.0 | 1.0 | 1.8 | 1 | Caltu_g18607v2_PBX    |
| 2.1e-13 | 44.5 | 0.1 | 5.4e-13 | 43.2 | 0.1 | 1.7 | 1 | Klefl00021_0250_TALE1 |
| 2.5e-06 | 21.9 | 1.6 | 5.4e-06 | 20.8 | 1.6 | 1.6 | 1 | Cyapa_20927.64_PBC2   |
| 4.4e-06 | 21.1 | 0.3 | 7.3e-06 | 20.4 | 0.3 | 1.3 | 1 | Porum_1010s0003_RPBX  |
| 2.5e-05 | 18.7 | 0.2 | 5.3e-05 | 17.6 | 0.2 | 1.5 | 1 | Pyrye_con7264         |

## Data S2. Domain alignment in fasta format.

KN-A domain

```

>Calliarthron_tuberculosis_g2262_extraction
MLPHPALALVIRFAFDA--RDADQVELREGD-----GTAEALR
>Cyanidizyon_merolae_CMH049C_extraction
VRSHSFFGKLASGVQDV-----VVAPPAD-----SSAEELQ
>Galdieria_sulfuraria_EME32194_extraction
IQQHESFVYSFLKALEA-----WKQIGWNT-----NHAVIQ
>Picocystis_salinarum_0325_extraction
LTSHPLFPSLLKQF-----RKNAE-----LLEELD
>Klebsormidium_flaccidum_00157_0150_extraction
ASKRRESKERDKQQVECGHNQEQEASKGAKKKRERKGGGRQAVSS
>Micromonas_commoda_62285_extraction
VRANPRYPKLLDAYFAC-----RRVGADAT-----SKASLA
>Micromonas_pusilla_69285_extraction
MRVHTMYPALLRAYFAC-----RSAGADRA-----TELALR
>Ostreococcus_tauri_04g04290_extraction
IRAHPMYARLVEAYYEC-----RKIGAHGD-----AAVALE
>Ostreococcus_lucimarinus_g5313_extraction
VRAHPMPRLVEAYYEC-----RQIGAEGD-----VLEALD
>Ostreococcus_sp_RCC809_56605_extraction
IRAHPMYSRLVEAYYEC-----RKIGADSE-----TADALE
>Bathycoccus_prasinus_08g03820_extraction
VRTHEKFREYVEIMMTC-----RKLTAQTK-----RERESLE
>Gonium_pectorale_KXZ56109_extraction
LLHHPRLRELVDVAVGC-----RKVVVRSR-----EAADELD
>Chlamydomonas_reinhardtii_GSM1_extraction
VQQHEAYPAVVRGTLDV-----RKACLPRFPLVAREQAEELQ
>Volvox_carteri_0053s0055_extraction
FLWHPQKADALLAVFEA-----KMAVTPVN-----AATNFT
>Chromochloris_zofingiensis_15g18055v2_extraction
VACHPLYPKIMDAICSC-----MKVAQPVE-----VTQQLD
>Pyramimonas_parkeae_01351541_extraction
IGSHPEFKRVVQLYGNL-----MRLDGHIT-----SMPPDME
>Pyramimonas_parkeae_01361191_extraction
IQKHRLYSRMDTAYLLGKHDNAMRFGENAD----GDFPLATTQ
>Cymbomonas_tetramitiformis_Sc2807_10_extraction
IITHPLYQRLVKANFER-----LKLGAEE-----AKAGID
>Cymbomonas_tetramitiformis_Sc9672_1v2_extraction

```

VMRHPLFPRLVQANFDS-----LRIGQLPS-----QVETLN  
>Pycnococcus\_sp\_01672\_extraction  
VAYHALYLRLVEAHFNV-----RRLSEKDS-----SDSVLE  
>Picocystis\_salinarum\_04387\_extraction  
ICAHPLYPKLLTAHFEC-----KMGVGLNEE-----EKASLQ  
>Acetabularia\_acetabulum\_AAD51632\_extraction  
VIMHPLYPDLVKAIMDC-----RKVGGMDE-----SRHHIQ  
>Pyramimonas\_amylifera\_03114\_extraction  
AYTLQLFCRIVHAYSRSQQNDDSRQMGLLAD-----SEDLLE  
>Pyramimonas\_amylifera\_035111\_extraction  
AHTLQLFCQNIHKYMRCLQVDGRLWSSSFSS-----SDRLF

>Arabidopsis\_thaliana\_STM\_extraction  
IMAHPHYHRLLAAYVNC-----QKVGAPPE-----VVARLE  
>Arabidopsis\_thaliana\_BP\_extraction  
IIAHPHYSTLLQAYLDC-----QKIGAPPD-----VVDRIT  
>Physcomitrella\_patens\_MKN5\_extraction  
IIDHPFYPEMVLAHVRV-----FKIGAPRR-----LINKLD  
>Physcomitrella\_patens\_MKN2\_extraction  
IIDHPFYPEMVLAHVRV-----FKIGAPRR-----LRRKLD  
>Klebsormidium\_flaccidum\_00113\_0180\_extraction  
IRRHDRYPELVGRLMDC-----LKVGASEN-----EIRRLD  
>Arabidopsis\_thaliana\_KNAT3\_extraction  
ILSHPLYEQLLSAHVAC-----LRIATPVD-----QLPRID  
>Physcomitrella\_patens\_MKN1\_extraction  
IVAHPPLYPDLLNAHASC-----LRVGTPVD-----QLPHIE  
>Physcomitrella\_patens\_MKN6v2\_extraction  
IVNHPLYPEMLMNAAC-----LRVGTPVD-----QLPSIE  
>Klebsormidium\_flaccidum\_00118\_0070\_extraction  
IECNQSYPKLIAAHVAC-----VQMDTSSP-----RLYQLE  
>Cyanoptycha\_gloeocystis\_026930\_extraction  
IRKHPLWPSVMTMFRDA-----EKSGIKKI-----QLSELP  
>Cyanophora\_paradoxa\_21179.70\_extraction  
VRSHPSFPLIAEGVRAV-----ELAGLLSR-----GHPAAAFP

---

KN-B domain

>Calliarthron\_tuberculosis\_g14488\_extraction  
NSDLLDVFFAALS----AALDQLRQTN  
>Calliarthron\_tuberculosis\_g2262\_extraction  
QSSSLDIFLSALC----SALREANSAS  
>Cyanidizyon\_merolae\_CMH049C\_extraction  
ILTILDTLAAAVCYV--RNLQAWVALQ  
>Picocystis\_salinarum\_0325\_extraction  
DFPELDEFYCINYI----ARLKAQREAV  
>Klebsormidium\_flaccidum\_00157\_0150\_extraction  
LQSEGPSFLPPDFL---TDLGGLDANL  
>Pyropia\_yezoensis\_g7505\_extraction  
D-AAKMEFVSAYM----ALMDVYEARC  
>Chondrus\_crispus\_c1808\_extraction  
S-VERARFFDTYE----RLIKEYEARC  
>Porphyra\_umbilicalis\_0247s0008\_extraction  
D-ASKMAFVSSYM----QLMDVYEARC  
>Cyanidizyon\_merolae\_CM153C\_extraction  
E-PSRNGFDGRST----GRLGTAETTP  
>Galdieria\_sulfuraria\_EME30635\_extraction  
N-EDFQHFLITYV----ELLEKEYEQR  
>Porphyridium\_purpureum\_3408.5\_extraction  
A-LAFRMQSAEYA----ELGMYESRL  
>Porphyridium\_purpureum\_2271.2\_extraction  
P-GSSDEWFHTYI----SLIESYKNRL

>Porphyridium\_purpureum\_4494.3\_extraction  
G-LGLKLSSGVAP----QTMDVFQQRL  
>Micromonas\_commoda\_62285\_extraction  
G-AELDEFMDNVT----DELTAYAEEL  
>Micromonas\_pusilla\_69285\_extraction  
G-EEMDDFIARCT----AELRAYSVEL  
>Ostreococcus\_tauri\_04g04290\_extraction  
S-CDLDEFMRDCT----HELETYVKEL  
>Ostreococcus\_lucimarinus\_g5313\_extraction  
Q-RDLDRFMRECT----HELESYVKEL  
>Ostreococcus\_sp\_RCC809\_56605\_extraction  
A-LDLDDYMRECT----HELESYVKEL  
>Bathycoccus\_prasinus\_08g03820\_extraction  
K-QELNAFMEHSC----ENARKFQKEL  
>Gonium\_pectorale\_KXZ56109\_extraction  
D-PALDLAVNQYI----DLCEAYQAEI  
>Chlamydomonas\_reinhardtii\_GSM1\_extraction  
N-PGLDEAMGAYV----RVAALYGDEA  
>Volvox\_carteri\_0053s0055\_extraction  
K-IDPMSFMERAV----GRLNMAHNLH  
>Chromochloris\_zofingiensis\_15g18055v2\_extraction  
D-EDLDAFMQRYL----QVLASYLREL  
>Tetraselmis\_astigmatica\_021027\_extraction  
EMEGCRHFVSKAA----EALD---QTL  
>Pyramimonas\_parkeae\_01351541\_extraction  
C-PELDEFMVLFR----QALERHWVDR  
>Pyramimonas\_parkeae\_01361191\_extraction  
P-SELDFMEDCC----KLEETWDEL  
>Cymbomonas\_tetramitiformis\_Sc2807\_10\_extraction  
D-EELDAFMLEYC----STVETQCGEM  
>Cymbomonas\_tetramitiformis\_Sc9672\_1v2\_extraction  
D-DDLDDFMLNYC----SILESHEET  
>Pycnococcus\_sp\_01672\_extraction  
D-HFLNEFMFKYV----MIVDSLHLEL  
>Picocystis\_salinarum\_04387\_extraction  
E-QEIRKFIQDYC----CTLESLRSDL  
>Acetabularia\_acetabulum\_AAD51632\_extraction  
D-PELDQFLRQYI----QVLDELHAEL  
>Pyramimonas\_amylifera\_029342\_extraction  
N-PELQRWRYQDIFGTWKEMESCDRNF  
>Pyramimonas\_amylifera\_03114\_extraction  
--RNIHGFLASDI-----ALLEVDSSI  
>Pyramimonas\_amylifera\_035111\_extraction  
E-GEVSDILEKFS----DTWREIESNT  
>Pyramimonas\_amylifera\_094156\_extraction  
E-KEVSDTCKSMI----STLEDFDFNT  
>Arabidopsis\_thaliana\_STM\_extraction  
D-PGLDQFMEAYC----EMLVKYEQEL  
>Arabidopsis\_thaliana\_BP\_extraction  
D-PELDQFMEAYC----DMLVKYREEL

>Physcomitrella\_patens\_MKN5\_extraction  
D-PALDHFMRYSYV----DMLTKFAEDL  
>Physcomitrella\_patens\_MKN2\_extraction  
D-PELDHFMRYSYV----GVLTKFAEDL  
>Klebsormidium\_flaccidum\_00113\_0180\_extraction  
E-PGLDKVMLIEK----QQLVALKQQL  
>Arabidopsis\_thaliana\_KNAT3\_extraction  
D-KELDQFMTHYV----LLLCSFKEQL  
>Physcomitrella\_patens\_MKN1\_extraction  
EKTELDQFMAQYI----MLLCSFKDHL  
>Physcomitrella\_patens\_MKN6v2\_extraction  
EKVELDRFMTEYT----ALLGDFKDVL  
>Klebsormidium\_flaccidum\_00118\_0070\_extraction  
A-PEVDAFMAECL----AQLGRLKAAL  
>Cyanoptycha\_gloeocystis\_026930\_extraction  
P-PSVQEFLLKMA----QLLQMQUIAAS  
>Cyanophora\_paradoxa\_21179.70\_extraction  
G-SQLDALVSQYIAALQQVLRFSFHGTL  
>Gloeochaete\_wittrockiana\_014496\_extraction  
P-PETNAGAYNSL---QRALRVQQQTS

---

PBL-Red domain

>HsPBX1\_extraction  
KLSQI-RQIYHTELEKYEQACNEFTTH-----VMNLLREQSRTR-PIS-----  
PKEIERMVSIIHRKFS-----SIQMQLKQS  
>Accas\_4342337\_extraction  
KVKKL-QEAYEVELGQLNLVADQYASH-----VMSLLKAQAATR-PIT-----  
DKEQSMKLAVLQERFD-----YLRTQLRQS  
>Guith\_137502\_extraction  
QIKLI-ENQFNSEKCKVDQVCEDVCQR-----MRTILNSQRKTR-HVS-----  
EQEENVHCQAIQAKFQ-----YQEYVNDCL  
>Naegr\_78561\_extraction  
RFKEL-QKQYRVECSYIDDALKKWQET-----FERVLNNQSSFR-VVS-----  
FEEKHRCKKSLEARFG-----LMKQLLKDK  
>Cyapa\_20927.63\_extraction  
KRAAL-ESWYNTQHRKIEVAEAEYRSK-----IEQELLAQRAFR-TIT-----  
PQEERTRLMKVENAFK-----TVRAELERK  
>Glowi\_03052\_extraction  
QRQQL-RVWYDAQLQKIDTAASDYTRQ-----VRAALEKQASLR-PVT-----  
PSEVAARVDKIQGYFR-----AVRLNLRRK  
>Caltu\_g18607\_extraction  
NVYKVLQANLSSRLKEVRDSAIMVEDV-----LERRLHRQLHFR-PVP-----  
VEEVDRRMEYIKIKFL-----RARLVIVEK  
>Chocr\_41034\_extraction  
NFVAL-KNSLMESLANVRHMAQDAVAE-----METNLAQQLHFR-IVP-----  
PEEVHNRRLRYIVSRFS-----KTRKEILHK  
>Porpu\_2282.2\_extraction  
HEAEF-EE-FKKRLQLMRARCVAYSFY-----LTEEELQKDFR-LVP-----

DVEIHERRREIVMTFL-----RARQKLIRS  
>Porpu\_3495.3\_extraction  
DDPRL-QE-LLEKLHALRQRCEIYTSI-----VSHELELQSKFR-LVP-----  
ELEAREREGEVVKAFI-----RARQTLIRL  
>Porpu\_4416.19\_extraction  
GDELM-NS-LIERLQMMRQRCELLSAG-----VVEELLLQSKFR-LVT-----  
PEEILERRARIVQLFL-----DARNRLVEN  
>Porpu\_3495.4\_extraction  
E-RAVFQQ-IRNVLQRLREVHGKWMKK-----VQHEICAQREFR-PVS-----  
KVEVMFWHNRITAICR-----AERVRIMQL  
>Porpu\_2095.1\_extraction  
ENPGTAKASSQTVMQMEEIRTVFQAA-----IIEELQEQSKCR-IIS-----  
PGEEKERLLAVAAIARAH-----AVRGENVRK  
>Porpu\_677.2\_extraction  
GHLELSESLDHHVQKLLKEIRLRYHYL-----MEHELRLQAEFR-IVR-----  
DAEKHGRLHAITALTADY-----KARGEALEA  
>Galsu\_EME32651v2\_extraction  
Q-KVMWKNWLIDLKTRWSDTVHHYMSL-----MLEELKQRRFR-TIT-----  
EEEVQSWIHPMMQTFE-----NIW-NIIRQ  
>Cyame\_CM176C\_extraction  
RNLALEYDGPYKDLVRLQAHCLANQVEQLWAESP-CRHEARAPVATRHSVSASASLATAS-  
AAEPRDTLYRLPTNVVQGACDASASDSNTXAARCKRKR  
>Picsa\_04995\_extraction  
ETSCPWERTANGNWDENWEAEVRESR-----FFEATEQLLLE-CLAYQKTC-----  
SRQMKEKPSFPHSRNECDGNQPTDSRCA-VPKDESHQH  
>Klefl00021\_0250\_extraction  
KTGRTGGTAALAEETRVGQTVETRRGW-----MEEEGGTGREKR--  
VGETGGTGGTGXPAEERDERERSRGKRSIEESSEEQD-----EARPRKRG
